# Supplementary material for: Using Geometric Morphometric Analysis of Magnetic Resonance Imaging to Assess the Anatomy of the Eustachian Tube in Children with and without Otitis Media
Source: MDPI journal article supplement (doi:10.3390/bioengineering10101115), 2023-09-23
Supplement: s1 [file s1]

Supplement 1: PC plot of PCs 1 and 2

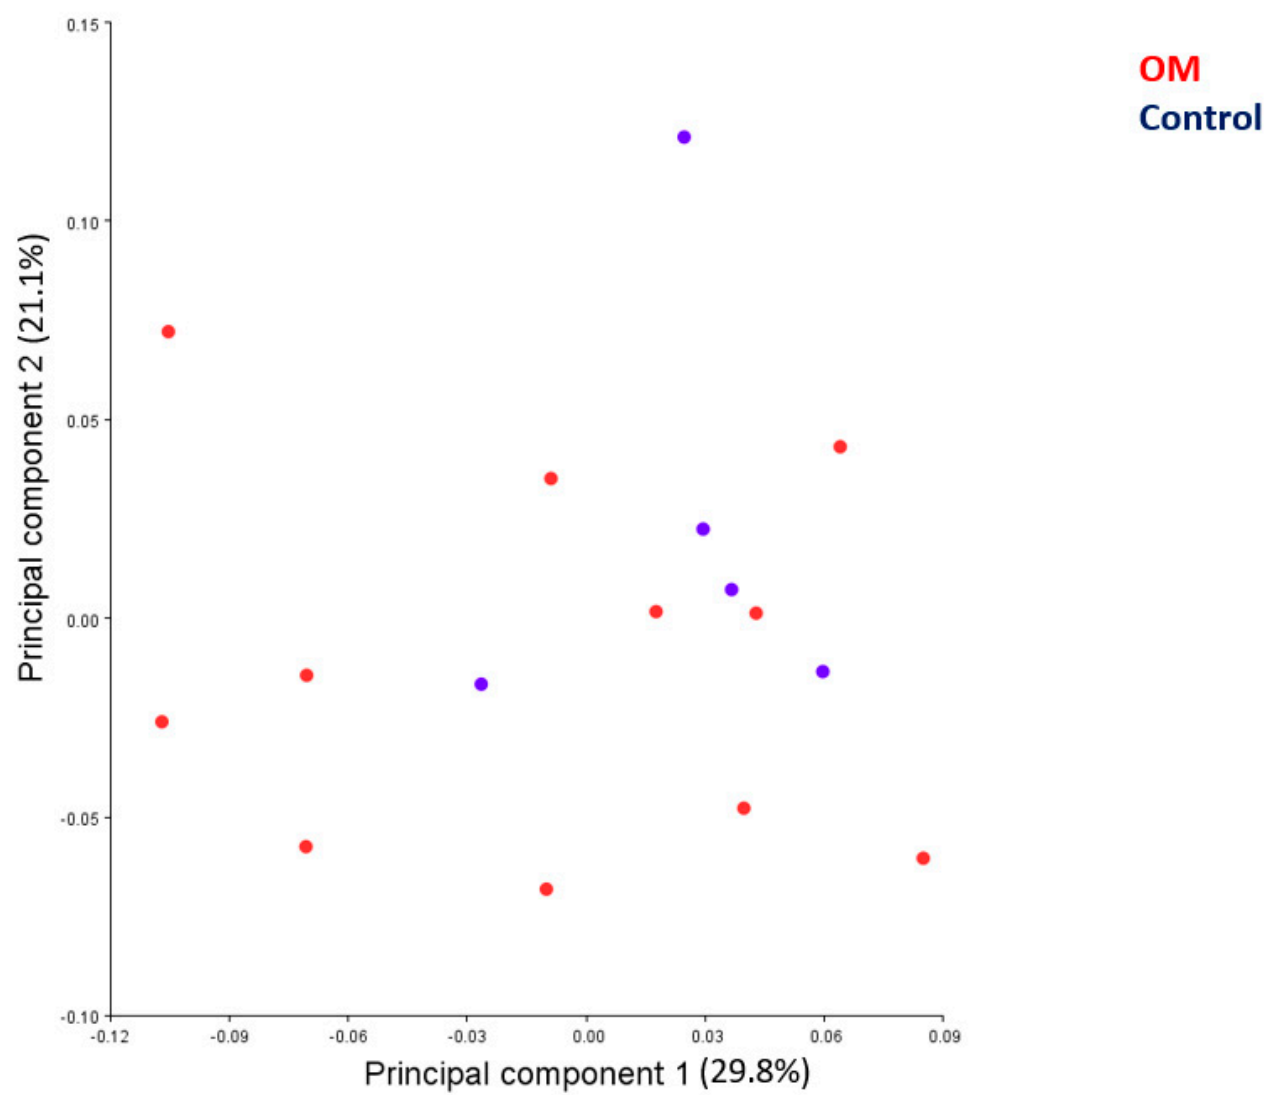

Supplement 2: Principal components coefficients

## Principal Component Coefficients

|     | PC1       | PC2       | PC3       | PC4       | PC5       | PC6       | PC7       | PC8       | PC9       | PC10      | PC11      | PC12      | PC13      | PC14      | PC15      |
|-----|-----------|-----------|-----------|-----------|-----------|-----------|-----------|-----------|-----------|-----------|-----------|-----------|-----------|-----------|-----------|
| x1  | 0.060918  | -0.060656 | 0.083884  | -0.241425 | -0.044764 | -0.032338 | -0.207926 | -0.383970 | -0.038223 | 0.184722  | 0.031293  | -0.259076 | -0.571507 | -0.310303 | 0.151693  |
| y1  | 0.000000  | 0.000000  | 0.000000  | 0.000000  | 0.000000  | 0.000000  | 0.000000  | 0.000000  | 0.000000  | 0.000000  | 0.000000  | 0.000000  | 0.000000  | 0.000000  | 0.000000  |
| z1  | -0.009218 | 0.197212  | 0.153975  | -0.109125 | 0.124901  | 0.121315  | 0.104089  | -0.161870 | -0.368419 | -0.149977 | -0.072701 | 0.350224  | -0.015448 | 0.067855  | 0.032409  |
| x2  | 0.027826  | -0.066404 | -0.014952 | -0.161139 | -0.165603 | -0.105639 | -0.077303 | 0.176260  | -0.225538 | 0.132355  | 0.119142  | 0.078666  | -0.137028 | 0.180389  | 0.180389  |
| y2  | 0.000000  | 0.000000  | 0.000000  | 0.000000  | 0.000000  | 0.000000  | 0.000000  | 0.000000  | 0.000000  | 0.000000  | 0.000000  | 0.000000  | 0.000000  | 0.000000  | 0.000000  |
| z2  | 0.010955  | 0.167827  | 0.095956  | -0.042951 | 0.041574  | -0.155648 | -0.037452 | 0.036650  | -0.022910 | 0.507892  | -0.389411 | -0.159437 | -0.189508 | 0.298756  | 0.151687  |
| x3  | -0.266246 | 0.233922  | -0.254112 | 0.139540  | 0.416420  | 0.026553  | -0.188161 | -0.006060 | 0.355619  | 0.024065  | 0.280031  | -0.050814 | -0.024779 | 0.324597  | 0.134208  |
| y3  | 0.000000  | 0.000000  | 0.000000  | 0.000000  | 0.000000  | 0.000000  | 0.000000  | 0.000000  | 0.000000  | 0.000000  | 0.000000  | 0.000000  | 0.000000  | 0.000000  | 0.000000  |
| z3  | 0.289102  | -0.125492 | 0.323745  | -0.072221 | -0.273085 | 0.105795  | -0.138524 | -0.180339 | 0.029424  | 0.185284  | 0.339588  | 0.213474  | 0.180001  | 0.442029  | 0.223255  |
| x4  | -0.142622 | 0.027888  | -0.308777 | 0.195633  | -0.206157 | -0.094931 | 0.241500  | -0.031940 | -0.460423 | 0.056073  | 0.303988  | 0.091744  | -0.156746 | -0.005895 | 0.193976  |
| y4  | 0.000000  | 0.000000  | 0.000000  | 0.000000  | 0.000000  | 0.000000  | 0.000000  | 0.000000  | 0.000000  | 0.000000  | 0.000000  | 0.000000  | 0.000000  | 0.000000  | 0.000000  |
| z4  | -0.315788 | -0.087269 | -0.191186 | -0.168140 | 0.061877  | 0.204235  | -0.192653 | 0.073535  | -0.148123 | 0.289956  | -0.141604 | -0.069545 | 0.283442  | -0.139032 | 0.060970  |
| y5  | -0.100278 | 0.020027  | -0.098009 | -0.258085 | 0.046110  | -0.192930 | 0.044995  | 0.012902  | 0.043482  | -0.016381 | 0.093920  | 0.171516  | -0.050252 | 0.168896  | -0.147535 |
| z5  | -0.055950 | -0.110173 | 0.022475  | 0.137064  | 0.195352  | 0.053582  | -0.268489 | 0.002860  | -0.305224 | -0.151144 | -0.051806 | 0.199148  | -0.155371 | 0.070428  | -0.001425 |
| y6  | -0.011730 | -0.001014 | -0.072496 | -0.173171 | 0.009303  | 0.201687  | -0.105402 | 0.409970  | -0.033649 | 0.030999  | 0.160354  | -0.037447 | -0.057793 | -0.143071 | 0.061251  |
| x6  | -0.000360 | 0.187235  | 0.022593  | 0.009281  | -0.128740 | -0.045951 | 0.218293  | 0.135424  | 0.015734  | 0.123699  | -0.190945 | 0.207467  | -0.132024 | -0.134348 | 0.141617  |
| y6  | 0.120754  | 0.137194  | 0.024188  | 0.168508  | 0.261009  | 0.050351  | 0.216253  | -0.063942 | -0.157936 | 0.169492  | -0.154418 | 0.155646  | 0.035590  | 0.018225  | -0.054887 |
| z6  | -0.025034 | -0.289549 | -0.166234 | 0.133368  | 0.173563  | -0.103945 | 0.062116  | 0.148800  | 0.102947  | -0.099091 | 0.169630  | 0.134632  | -0.183129 | 0.047496  | 0.047496  |
| x7  | 0.069693  | -0.042938 | -0.193911 | 0.139158  | -0.232742 | 0.106766  | -0.052558 | 0.002373  | -0.010095 | -0.013971 | -0.223310 | -0.075939 | -0.049423 | 0.156683  | -0.250609 |
| y7  | 0.161894  | 0.022987  | -0.228806 | 0.213366  | -0.155018 | 0.294364  | -0.029674 | -0.072921 | 0.059333  | 0.016029  | 0.086218  | -0.032873 | -0.001351 | -0.032496 | 0.146022  |
| z7  | -0.059463 | -0.173683 | -0.052426 | -0.053661 | -0.121445 | -0.061217 | 0.038053  | -0.053412 | -0.113061 | -0.074974 | 0.038455  | -0.207596 | 0.090608  | 0.154439  | -0.228080 |
| x8  | -0.119339 | -0.112386 | 0.317578  | 0.095367  | 0.053794  | 0.199518  | 0.075613  | 0.018494  | 0.080923  | 0.080119  | 0.083939  | -0.054569 | 0.033222  | -0.031008 | -0.174914 |
| y8  | -0.083002 | 0.008768  | 0.113776  | 0.204725  | -0.109241 | -0.191244 | -0.176912 | 0.075003  | -0.049484 | 0.255525  | 0.111568  | 0.019687  | -0.196790 | -0.264201 | 0.047496  |
| z8  | -0.097500 | 0.277040  | 0.060792  | 0.103534  | -0.061282 | 0.000003  | -0.039592 | -0.109159 | 0.069520  | -0.174988 | -0.054238 | -0.051872 | 0.001671  | -0.006564 | -0.037816 |
| y9  | -0.115862 | -0.213081 | 0.228933  | 0.079982  | 0.067216  | 0.102613  | 0.103820  | 0.052117  | -0.039209 | -0.155441 | -0.062172 | -0.144293 | 0.044168  | -0.002063 | 0.177113  |
| z9  | -0.062652 | -0.064960 | 0.076360  | 0.284802  | -0.075277 | -0.265690 | -0.200040 | 0.186392  | 0.002490  | -0.032623 | -0.073321 | -0.048503 | 0.014517  | 0.094656  | 0.220946  |
| y10 | -0.056637 | 0.262498  | 0.097393  | 0.100192  | -0.078577 | -0.047221 | -0.036795 | -0.090068 | 0.056717  | -0.188852 | 0.039849  | -0.037954 | -0.024676 | -0.155427 | -0.048668 |
| x10 | 0.426218  | 0.093768  | -0.031106 | -0.029775 | 0.192183  | -0.066839 | -0.232680 | 0.028326  | -0.037686 | -0.055265 | -0.054681 | 0.227344  | -0.093841 | -0.075806 | 0.047496  |
| y10 | -0.000985 | -0.022818 | -0.015130 | -0.086160 | 0.003319  | -0.252702 | 0.071467  | -0.015979 | -0.166864 | -0.077779 | 0.118468  | -0.290040 | 0.195049  | -0.017028 | 0.146575  |
| z10 | 0.257778  | -0.151430 | -0.020094 | 0.086467  | 0.100805  | -0.127155 | 0.213989  | 0.230137  | 0.126688  | -0.096209 | 0.037235  | 0.038882  | -0.273885 | -0.001052 | -0.028294 |
| x11 | -0.100278 | 0.020027  | -0.098009 | -0.258085 | 0.046110  | -0.192930 | 0.044995  | 0.012902  | 0.043482  | -0.016381 | 0.093920  | 0.171516  | -0.050252 | 0.168896  | -0.147535 |
| y11 | 0.055950  | 0.110173  | -0.022475 | -0.137064 | -0.195352 | -0.053582 | 0.268489  | -0.002860 | 0.305224  | 0.151144  | 0.001806  | -0.199148 | 0.155371  | -0.070428 | 0.001425  |
| z11 | -0.011730 | -0.001014 | -0.072496 | -0.173171 | 0.009303  | 0.201687  | -0.105402 | 0.409970  | -0.033649 | 0.030999  | 0.160354  | -0.037447 | -0.057793 | -0.143071 | 0.061251  |
| x12 | -0.000360 | 0.187235  | 0.022593  | 0.009281  | -0.128740 | -0.045951 | 0.218293  | 0.135424  | 0.015734  | 0.123699  | -0.190945 | 0.207467  | -0.132024 | -0.134348 | 0.141617  |
| y12 | -0.120754 | -0.137194 | -0.024188 | -0.168508 | -0.261009 | -0.050351 | -0.216253 | 0.063942  | -0.157936 | 0.169492  | -0.154418 | 0.155646  | -0.035590 | -0.018225 | 0.054887  |
| z12 | -0.025034 | -0.289549 | -0.166234 | 0.133368  | 0.173563  | -0.103945 | 0.062116  | -0.271476 | 0.148800  | 0.102947  | -0.099091 | 0.169630  | 0.134632  | -0.183129 | 0.047496  |
| x13 | 0.069693  | -0.042938 | -0.193911 | 0.139158  | -0.232742 | 0.106766  | -0.052558 | 0.002373  | -0.010095 | -0.013971 | -0.223310 | -0.075939 | -0.049423 | 0.156683  | -0.250609 |
| y13 | -0.161894 | 0.022987  | -0.228806 | -0.213366 | 0.155018  | 0.294364  | 0.029674  | 0.072921  | -0.059333 | -0.016029 | 0.086218  | 0.032873  | 0.001351  | 0.032496  | -0.146022 |
| z13 | -0.059463 | -0.173683 | -0.052426 | -0.053661 | -0.121445 | -0.061217 | 0.038053  | -0.053412 | -0.113061 | -0.074974 | 0.038455  | -0.207596 | 0.090608  | 0.154439  | -0.228080 |
| x14 | -0.119339 | -0.112386 | 0.317578  | 0.095367  | 0.053794  | 0.199518  | 0.075613  | 0.018494  | 0.080923  | 0.080119  | 0.083939  | -0.054569 | 0.033222  | -0.031008 | -0.174914 |
| y14 | 0.069602  | -0.006768 | -0.113776 | -0.204725 | 0.109241  | 0.191244  | 0.176912  | -0.075003 | 0.049484  | -0.255525 | -0.220725 | -0.111568 | -0.019687 | 0.196790  | 0.264201  |
| z14 | -0.097500 | 0.277040  | 0.060792  | 0.103534  | -0.061282 | 0.000003  | -0.039592 | -0.109159 | 0.069520  | -0.174988 | -0.054238 | -0.091872 | 0.001671  | -0.006564 | -0.037816 |
| x15 | -0.115862 | -0.213081 | 0.228933  | 0.079982  | 0.067216  | 0.102613  | 0.103820  | 0.052117  | -0.039209 | -0.155441 | -0.062172 | -0.144293 | 0.044168  | -0.002063 | 0.177113  |
| y15 | 0.062652  | 0.064960  | -0.076360 | -0.284802 | 0.075277  | 0.265690  | 0.200040  | -0.186392 | -0.002490 | 0.032623  | 0.073321  | 0.048503  | -0.014517 | -0.094656 | -0.220946 |
| z15 | -0.056637 | 0.262498  | 0.097393  | 0.100192  | -0.078577 | -0.047221 | -0.036795 | -0.090068 | 0.056717  | -0.188852 | 0.039849  | -0.037954 | -0.024676 | -0.155427 | -0.048668 |
| x16 | 0.426218  | 0.093768  | -0.031106 | -0.029775 | 0.192183  | -0.066839 | -0.232680 | 0.028326  | -0.037686 | -0.055265 | -0.054681 | 0.227344  | -0.093841 | -0.075806 | 0.047496  |
| y16 | 0.000985  | 0.022818  | 0.015130  | 0.086160  | -0.003319 | 0.252702  | -0.071467 | 0.015979  | 0.166864  | 0.077779  | -0.118468 | 0.290040  | -0.195049 | 0.017028  | -0.146575 |
| z16 | 0.257778  | -0.151430 | -0.020094 | 0.086467  | 0.100805  | -0.127155 | 0.213989  | 0.230137  | 0.126688  | -0.096209 | 0.037235  | 0.038882  | -0.273885 | -0.001052 | -0.028294 |
